# Supplementary material for: Sensitivity and Specificity of Plasma ALT, ALP, and Bile Acids for Hepatitis in Labrador Retrievers
Source: PubMed Central journal article supplement — J Vet Intern Med. 2017 May 23;31(4):1017–27. doi: 10.1111/jvim.14716 (PMC5508325; doi:10.1111/jvim.14716), 2017-05-23
Supplement: JVIM-31-1017-s001.pdf [file JVIM-31-1017-s001.pdf]

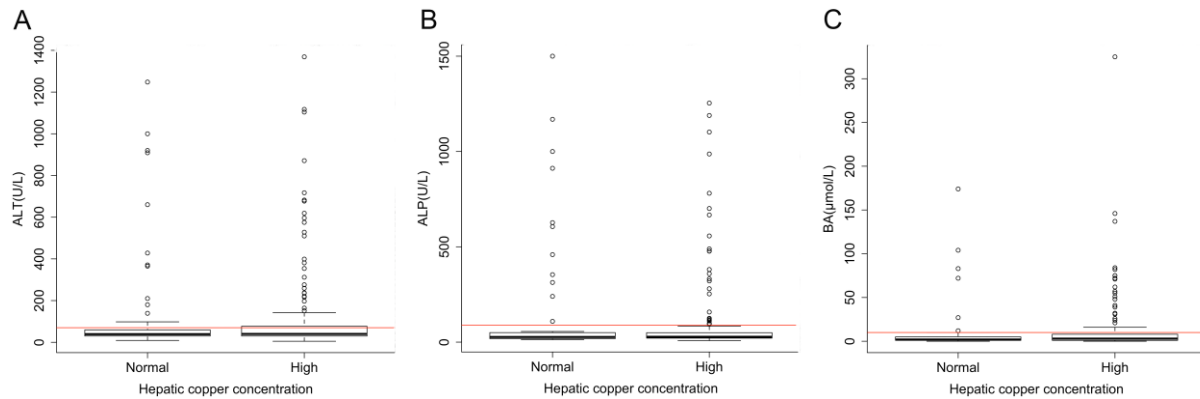

**Supporting figure 1.** Concentrations of ALT (**A**), ALP (**B**) and BA (**C**) in all Labrador retrievers with known hepatic quantitative copper concentrations ( $n=222$ ). Horizontal red lines indicate upper reference limits for ALT ( $<70$  U/L), ALP ( $<89$  U/L), and BA ( $<10$   $\mu\text{mol/L}$ ). There were no statistically significant differences in ALT, ALP and BA concentrations in dogs with normal ( $<400$  mg/kg/dwl) or increased ( $>400$  mg/kg/dwl) hepatic copper concentrations. The thick black line represents the median (50th percentile), also the first and third quartile (25th and 75th percentile respectively) are displayed. Outliers are depicted with an open dot, representing values higher than 1.5 times the interquartile range. ALT, alanine aminotransferase; ALP, alkaline phosphatase; BA, bile acids
